# Supplementary material
Source: PubMed Central journal article supplement (PMC5353942)

**Supplementary Table 1. Characteristic of melanoma patients treated with Ipilimumab.**

Biographical and clinical data of patients enrolled in the study.

| <b>Variables</b>             | <b>Italy n (%)</b> | <b>Sweden n (%)</b> |
|------------------------------|--------------------|---------------------|
| Number of patients           | 115                | 29                  |
| Median age                   | 61.3 (28-84)       | 67 (40-77)          |
| <b>SEX</b>                   |                    |                     |
| Male                         | 63(54.8)           | 23(79)              |
| Female                       | 52(45.2)           | 6(21)               |
| <b>Primary melanoma site</b> |                    |                     |
| Cutaneous                    | 86(74.8)           | 15(52)              |
| Mucosal                      | 6(5.2)             | 2(7)                |
| Uveal                        | 9(7.8)             | 0(0)                |
| S.P.I.                       | 6(5.2)             | 2(7)                |
| Unclassified                 | 8(7.0)             | 10(34)              |
| <b>Site of melanoma</b>      |                    |                     |
| <b>AJCC Stage</b>            |                    |                     |
| IV                           | 115(100)           | 29(100)             |
| M1a                          | 6(5.2)             | 4(14)               |
| M1b                          | 6(5.2)             | 5(17)               |
| M1c                          | 103 (89.6)         | 20(69)              |
| CNS metastases at baseline   | 17 (32.1)          | 6 (21)              |
| LDH level                    |                    |                     |
| Elevate (>480)               | 36(31.3)           | 5 (20)              |
| Normal                       | 49(42.6)           | 2(20)               |
| UNK                          | 30(26.1)           | 2(20)               |
| <b>Prior Therapy</b>         |                    |                     |
| N=0                          | 44(38.2)           | 6(60)               |
| N=1                          | 63(54.9)           | 1(10)               |
| N=2                          | 8(6.9)             | 3(30)               |
| <b>BRAF Status</b>           |                    |                     |
| Screened for BRAF mutation   | 115(100)           | 27(93)              |
| Not evaluable                | 24(20.9)           |                     |
| Wild type                    | 45(39.1)           | 19(70)              |
| Mutation                     | 46(40)             | 10(30)              |
| N-RAS mutated                | 6(5.2)1(1.9)       | -                   |

**Supplementary Table 2. Variables used in multivariate analysis at time point w0.** In total, 131 parameters were considered, including biological, clinical and immune variables.

| <b>Variables w0</b>                                                                                                                            | <b>Types</b>                                   |
|------------------------------------------------------------------------------------------------------------------------------------------------|------------------------------------------------|
| Site MELANOMA                                                                                                                                  | /, back, foot, leg, neck, scalp, thorax, vulva |
| Kind of melanoma                                                                                                                               | cutaneous, mucosal, SPI(ignoto), uveal, vulva  |
| Melanoma size mm                                                                                                                               |                                                |
| Ulceration                                                                                                                                     | NO ulcer, ulcer                                |
| Age                                                                                                                                            |                                                |
| Nr of ipi doses                                                                                                                                |                                                |
| Concurrent medical systemic melanoma treatment (e.g DTIC in BMS-24). Describe months passed between IPI infusion and current medical treatment | NO, PEMBROLIZUMAB                              |
| months passed between the last treatment and IPI infusion                                                                                      |                                                |
| Site metastatis (code)                                                                                                                         |                                                |
| CNS metastases at start of ipi (yes/no)                                                                                                        | NO, YES                                        |
| SEX                                                                                                                                            | F, M                                           |
| LDH U/L (4W bf dose)                                                                                                                           |                                                |
| WBC (4W bf dose)                                                                                                                               |                                                |
| Neutrophils (4W bf dose)                                                                                                                       |                                                |
| lymphocytes (4W bf dose)                                                                                                                       |                                                |
| Monocyte (4W bf dose)                                                                                                                          |                                                |
| eosinophil (4W bf dose)                                                                                                                        |                                                |
| basophils (4W bf dose)                                                                                                                         |                                                |
| Lymphocytes (%)                                                                                                                                |                                                |
| Lymphocytes (events)                                                                                                                           |                                                |
| CD3 %                                                                                                                                          |                                                |
| CD3 (events)                                                                                                                                   |                                                |
| CD4 %                                                                                                                                          |                                                |
| CD4 (events)                                                                                                                                   |                                                |
| CD8 %                                                                                                                                          |                                                |
| CD8 (events)                                                                                                                                   |                                                |
| CD4/CD8 %                                                                                                                                      |                                                |
| NKT %                                                                                                                                          |                                                |
| CD56 (events)                                                                                                                                  |                                                |
| CD56 bright %                                                                                                                                  |                                                |
| CD56 dim %                                                                                                                                     |                                                |
| CD56 bright/NK %                                                                                                                               |                                                |
| CD56 dim/NK %                                                                                                                                  |                                                |
| bright/dim %                                                                                                                                   |                                                |
| CD56+ CD8+ %                                                                                                                                   |                                                |
| PD-1+ CD4+ %                                                                                                                                   |                                                |
| PD-1+ CD8+ %                                                                                                                                   |                                                |
| PD-1 CD56 bright %                                                                                                                             |                                                |
| PD-1 CD56 dim %                                                                                                                                |                                                |

|                                                                                                                                                                                                                                                                                                                                                                                                                                                                                                                                                                                                                                                                                                                                                                                                                                                                                                                                                                                                                                                |  |
|------------------------------------------------------------------------------------------------------------------------------------------------------------------------------------------------------------------------------------------------------------------------------------------------------------------------------------------------------------------------------------------------------------------------------------------------------------------------------------------------------------------------------------------------------------------------------------------------------------------------------------------------------------------------------------------------------------------------------------------------------------------------------------------------------------------------------------------------------------------------------------------------------------------------------------------------------------------------------------------------------------------------------------------------|--|
| <p> CD57+ CD4 %<br/> CD57+ CD8+ %<br/> CD57 bright %<br/> CD57 dim %<br/> CD57 bright/CD57 dim %<br/> CCR7+ CD8+ %<br/> CCR7 bright %<br/> CCR7 dim %<br/> CCR2+ CD3+ %<br/> CCR2 bright %<br/> CCR2 dim %<br/> CXCR2+ CD3+ %<br/> CXCR2 bright %<br/> CXCR2 dim %<br/> CD16 bright %<br/> CD16 dim %<br/> CD69+ CD3+ %<br/> CD69 bright %<br/> CD69 dim %<br/> NKG2C bright %<br/> NKG2C dim %<br/> NKG2A bright %<br/> NKG2A dim %<br/> NKG2D+CD3 %<br/> NKG2D bright %<br/> NKG2D dim %<br/> KIRS+ CD8+ %<br/> KIRS bright %<br/> KIRS dim %<br/> DNAM-1+CD3 %<br/> DNAM-1 bright %<br/> DNAM-1 dim %<br/> NKp30 bright %<br/> NKp30 dim %<br/> NKp46 bright %<br/> NKp46 dim %<br/> TIM3+ CD3+ %<br/> TIM3+ CD8+ %<br/> TIM3+ CD8+ PD-1+ %<br/> TIM3 bright %<br/> TIM3 dim %<br/> PD-1+ CD3+ MFI<br/> PD-1+ CD8+ MFI<br/> PD-1 CD56 bright MFI<br/> PD-1 CD56 dim MFI<br/> CCR7+ CD3+ MFI<br/> CCR7+ CD8+ MFI<br/> CCR7 bright MFI<br/> CCR7 dim MFI<br/> CCR2+ CD3+ MFI<br/> CCR2 bright MFI<br/> CCR2 dim MFI<br/> CXCR2+ CD3+ MFI </p> |  |
|------------------------------------------------------------------------------------------------------------------------------------------------------------------------------------------------------------------------------------------------------------------------------------------------------------------------------------------------------------------------------------------------------------------------------------------------------------------------------------------------------------------------------------------------------------------------------------------------------------------------------------------------------------------------------------------------------------------------------------------------------------------------------------------------------------------------------------------------------------------------------------------------------------------------------------------------------------------------------------------------------------------------------------------------|--|

|                   |  |
|-------------------|--|
| CXCR2 bright MFI  |  |
| CXCR2 dim MFI     |  |
| CD16 bright MFI   |  |
| CD16 dim MFI      |  |
| CD69+ CD3+ MFI    |  |
| CD69 bright MFI   |  |
| CD69 dim MFI      |  |
| NKG2D+CD3 MFI     |  |
| NKG2D bright MFI  |  |
| NKG2D dim MFI     |  |
| KIRS+ CD8+ MFI    |  |
| KIRS bright MFI   |  |
| KIRS dim MFI      |  |
| DNAM-1+CD3 MFI    |  |
| DNAM-1 bright MFI |  |
| DNAM-1 dim MFI    |  |
| NKp30 bright MFI  |  |
| NKp30 dim MFI     |  |
| NKp46 bright MFI  |  |
| NKp46 dim MFI     |  |
| TIM3+ CD3+ MFI    |  |
| TIM3+ CD8+ MFI    |  |
| TIM3 bright MFI   |  |
| TIM3 dim MFI      |  |
| IL-2              |  |
| IL-4              |  |
| IL-6              |  |
| IL-8              |  |
| IL-10             |  |
| VEGF              |  |
| INFg              |  |
| TNF               |  |
| IL-1a             |  |
| IL-1b             |  |
| MCP-1             |  |
| EGF               |  |
| IL-15             |  |
| IL-21             |  |

**Supplementary Table 3. Additional variables used in multivariate analysis at time point W1 and W2.** In total, 134 variables were used for W1 and W2 model building.

| <b>Variables w1 and w2</b> | <b>Types</b>                                |
|----------------------------|---------------------------------------------|
| Side effect Cholitis       | G1, G2, G3, NO                              |
| Skin itch                  | G1, G2, NO                                  |
| COMMENTS                   | Low dosage cortison, middle dosage cortison |

**Supplementary Table 4. Additional variables used in multivariate analysis at time point W3.**

In total, 135 variables were used.

| <b>Variables w3</b> | <b>Types</b> |
|---------------------|--------------|
| RECIST              | PD, PR, SD   |

**Supplementary Table 5. Clinical response and overall survival after therapy with ipilimumab.**

Clinical parameters used to define the tumor response to the therapy.

|                                                                                                  |          |         |
|--------------------------------------------------------------------------------------------------|----------|---------|
| <b>Best overall response:</b>                                                                    |          |         |
| Complete response                                                                                | 3(2.6)   | 0       |
| Partial response                                                                                 | 10(8.7)  | 12(41)  |
| Stable disease                                                                                   | 24(20.9) | 10(34)  |
| Progression disease                                                                              | 78(67.8) | 7(25)   |
| <b>Overall Survival (mo)</b>                                                                     |          |         |
| Median OS                                                                                        | 10,7     | 18      |
| OS ≤6 mo (%)                                                                                     | 38(33)   | 10(100) |
| 6 < OS ≤12 mo (%)                                                                                | 36(31.3) | 26(83)  |
| 12 < OS ≤24 mo (%)                                                                               | 37(32.2) | 18(66)  |
| OS > 24 mo (%)                                                                                   | 4(3.5)   | 5(22)   |
| <b>Side effect to IPI</b>                                                                        |          |         |
| Colitis                                                                                          | 19(16.5) | 2(7)    |
| Skin itch                                                                                        | 21(18.3) | 7(24)   |
| Other                                                                                            | 6(5.2)   | 17(30)  |
| No side effects                                                                                  | 69(60)   | 15(52)  |
| irRC, immune-related response criteria; OS, overall survival; mo, month; CI, confidence interval |          |         |

**Supplementary Table 6.** Results of Cox regression. For each predictive marker, we fitted a Cox model adjusted for age, sex, melanoma type, and the binary indicator of recist = “pd”. We report the adjusted hazard ratio (hr) and a 95% asymptotic confidence interval (low, up) with the corresponding p-value; p\_value\_ph refers to the Shoenfeld's test for proportionality of hazards.

| <b>TIME W0</b>  | <b>hr</b> | <b>low</b> | <b>up</b> | <b>p</b> | <b>p_value_ph</b> |
|-----------------|-----------|------------|-----------|----------|-------------------|
| CD56_bright     | 0.6049    | 0.2689     | 1.3610    | 0.2244   | 0.2906            |
| TIM3_bright     | 1.0210    | 0.9935     | 1.0493    | 0.1353   | 0.1059            |
| TIM3_dim        | 0.9948    | 0.9781     | 1.0118    | 0.5465   | 0.9726            |
| TIM3_bright_MFI | 1.0006    | 1.0002     | 1.0009    | 0.0055   | 0.8461            |
| TIM3_dim_MFI    | 1.0007    | 1.0001     | 1.0012    | 0.0180   | 0.7409            |
| IL_15           | 1.2551    | 1.0995     | 1.4326    | 0.0008   | 0.6566            |
| CD56_dim        | 0.9865    | 0.9567     | 1.0173    | 0.3870   | 0.1543            |
| <b>TIME W3</b>  | <b>hr</b> | <b>low</b> | <b>up</b> | <b>p</b> | <b>p_value_ph</b> |
| CD56_bright     | 0.6518    | 0.2661     | 1.5964    | 0.3490   | 0.0589            |
| TIM3_bright     | 0.9892    | 0.9583     | 1.0210    | 0.5010   | 0.3554            |
| TIM3_dim        | 0.9849    | 0.9635     | 1.0068    | 0.1764   | 0.4475            |
| TIM3_bright_MFI | 1.0005    | 0.9996     | 1.0014    | 0.2621   | 0.1601            |
| TIM3_dim_MFI    | 1.0004    | 0.9992     | 1.0017    | 0.4895   | 0.2229            |
| IL_15           | 1.1165    | 0.9917     | 1.2569    | 0.0683   | 0.5919            |
| CD56_dim        | 0.9213    | 0.8598     | 0.9872    | 0.0201   | 0.7528            |

**Supplementary Figure 1. Gating strategy for flow cytometer analysis.** Cells were first gated for lymphocytes (SSC-A vs FSC-A) and singlets (FSC-H vs FSC-A). The lymphocyte gate is further analysed for their uptake of 7aad stain to determine live versus dead cells and their expression of CD3 and CD56, taking only the live cells. To exclude B cells contamination in the NK cell subset, we gate on CD56<sup>+</sup> CD19<sup>-</sup>.

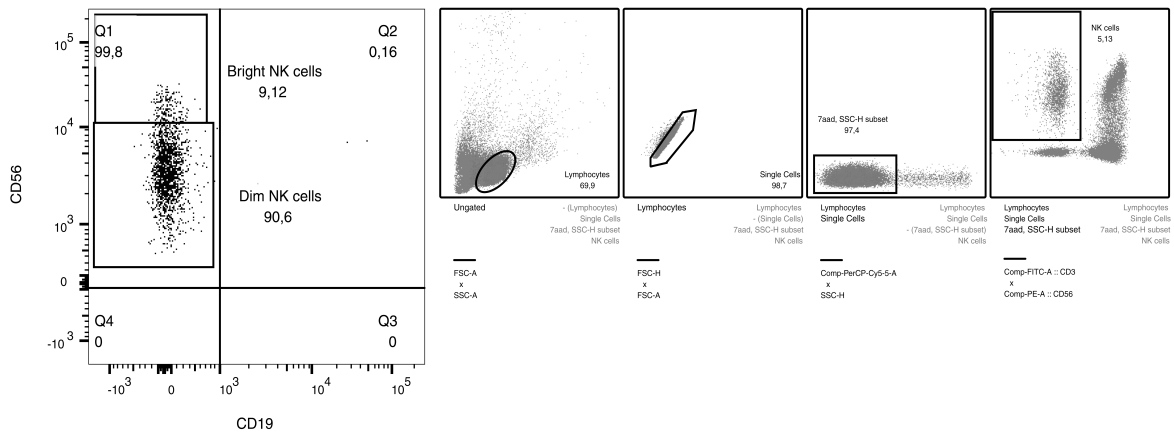



**Supplementary Figure 2. Changes in NK cells phenotype at W1 and W2.** Gray squares = long survivors, 12 months or more. Black circles = short survivors, < 12 months. Long and short survivors at W1 and W2 treatment, 17 long survivors, 21 short survivors (**A, D**). Horizontal axis = predictive component, vertical axis = order of patients. Orange striped lines represent two confidence intervals of the model. Horizontal axis = predictive component. Vertical axis = Orthogonal component not related to difference between groups. (**A**) Withdrawal 1 only had one significant component, therefore +/- 2 confidence interval limit is displayed instead. 3 and 5 most significant variables correlated to long survival respectively at W1 (**B**) and W2 (**E**) treatment. Error bars = 95 % confidence intervals. Positive correlation to long survival means negative correlation to short survival, and vice versa. Frequency of CXCR2 on CD56<sup>bright</sup> cell subsets at W1 (**C**) and W2 (**F**) in peripheral blood of short (n. 21) and long (n.22) survivors. Statistical analyses were performed with Mann Whitney and Unpaired t test \*\*\*: p-value < 0.001; \*\*: p-value < 0.01; \*: p-value < 0.05.

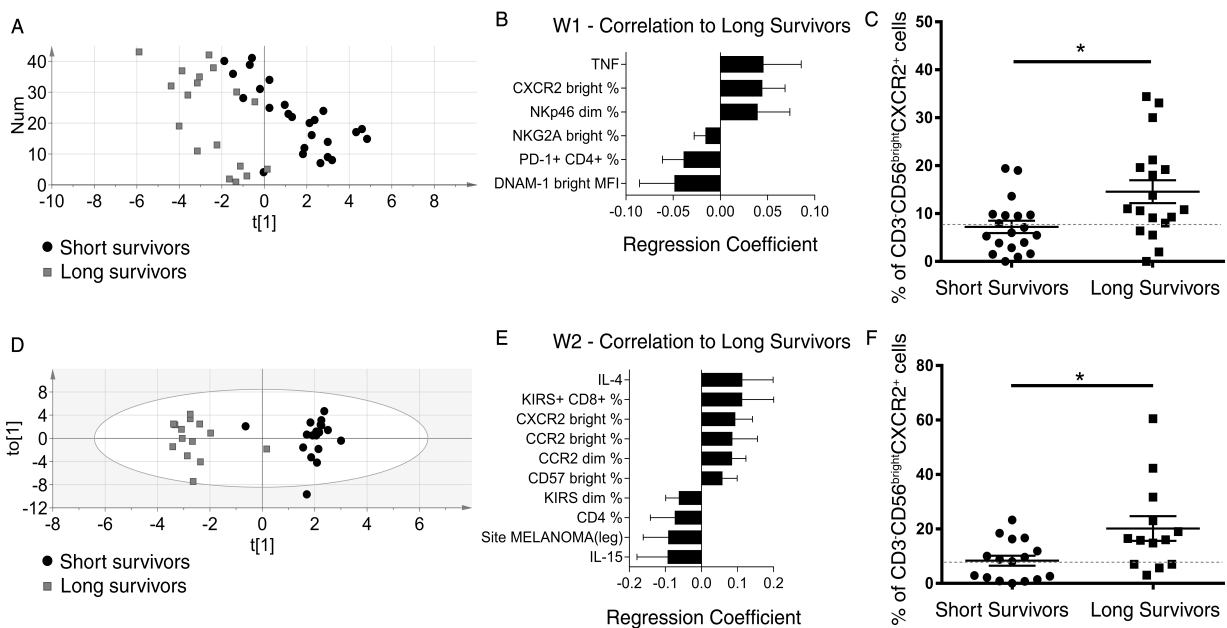

**Supplementary Figure 3. Analysis of differences between Italian and Swedish long survivors.** Comparison of healthy donors and the two groups of long survivors for the significant markers. The statistical analysis does not evidence significative differences in expression **(A)** and frequency **(B)**, between Italian and Swedish long survivors. Supplementary Figure 4. In vitro effects of 10pg/ml IL-15 stimulation on NK and T cells phenotype. FACS assessment of the mean fluorescent intensities (MFI) and percentage of **(A)** NK cells ( $CD3^-CD56^+$ ), **(B)**  $CD4^+$  T cells ( $CD3^+CD4^+$ ) and **(C)**  $CD8^+$  T cells ( $CD3^+CD8^+$ ) expressing TIM-3, PD-1 and KIRs at resting (no treatment) or after 120h of stimulation with IL-15 at 10pg/ml concentration. The data are presented as representative dot plots where the percentage of cells in each quadrant is indicated, and as representative histogram plots. Columns represent the statistical analysis from 3 independent experiments, \*: p-value < 0.05 by Student's t test. Error bars, s.d.

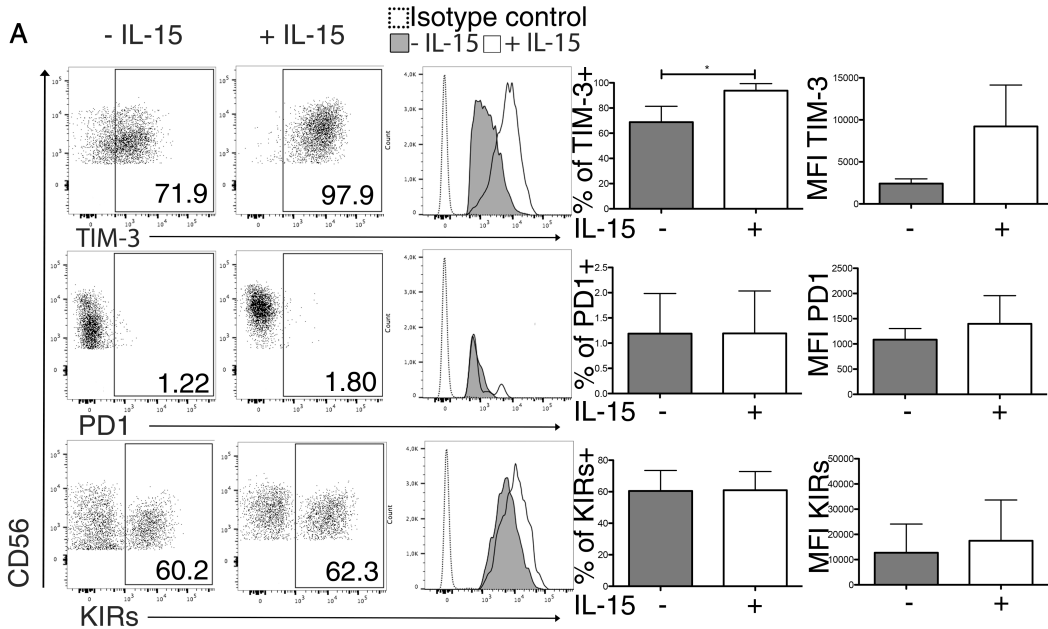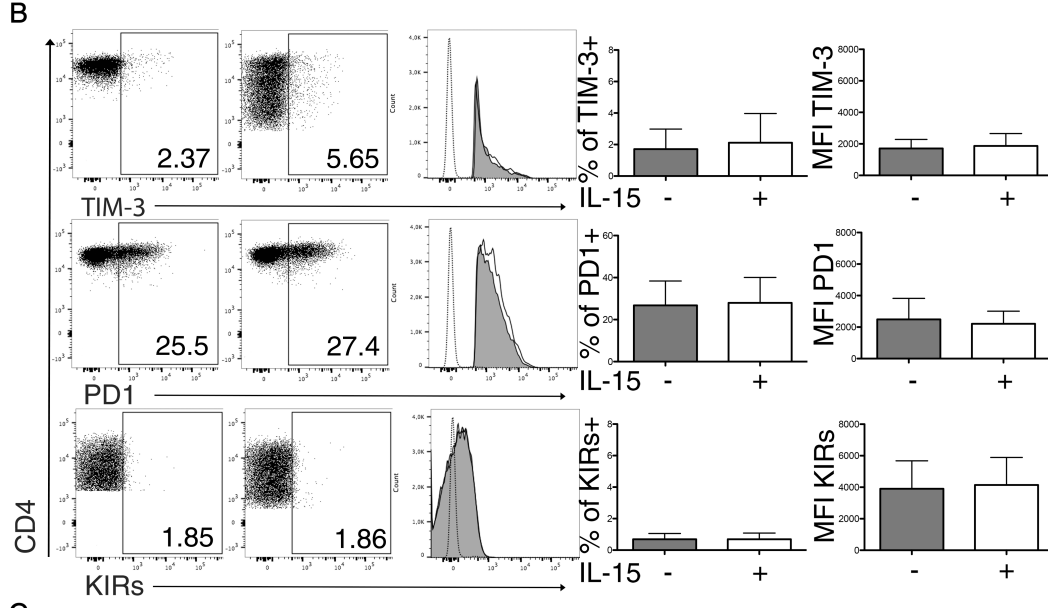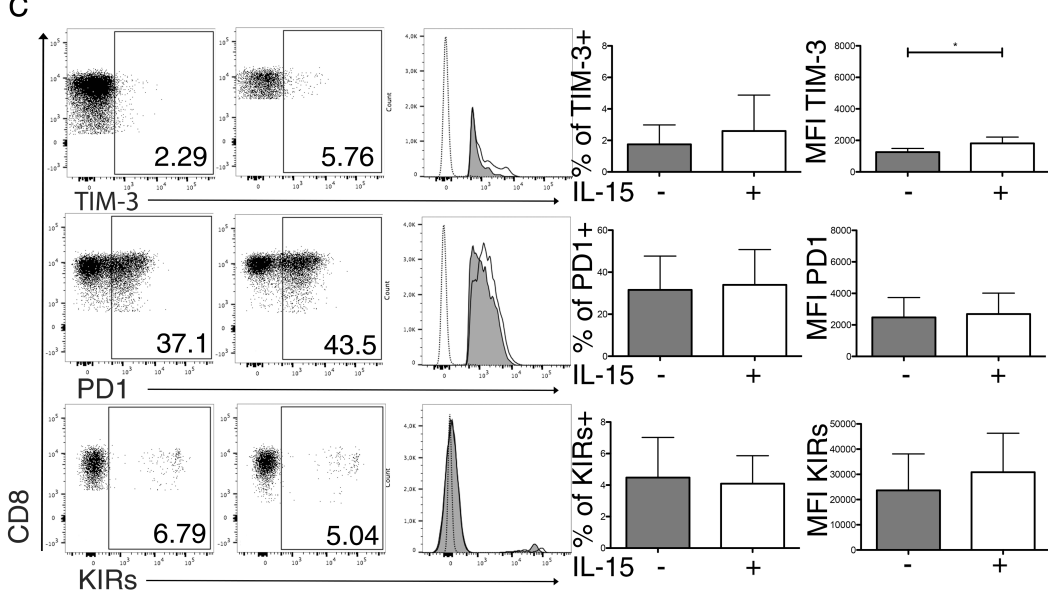

Supplement: koni-06-02-1261242-s001.pdf [file koni-06-02-1261242-s001.pdf]
